# Supplementary material for: Fasudil alleviates lipopolysaccharides-triggered damage to BEAS-2B cells and human lung organoids by inducing CLDN4 expression
Source: Research Square preprint supplement (doi:10.21203/rs.3.rs-5481369/v1), 2024-12-02
Supplement: Supplementary file 1 [file e03ad3eb57acad2320dc8d83.docx]

**
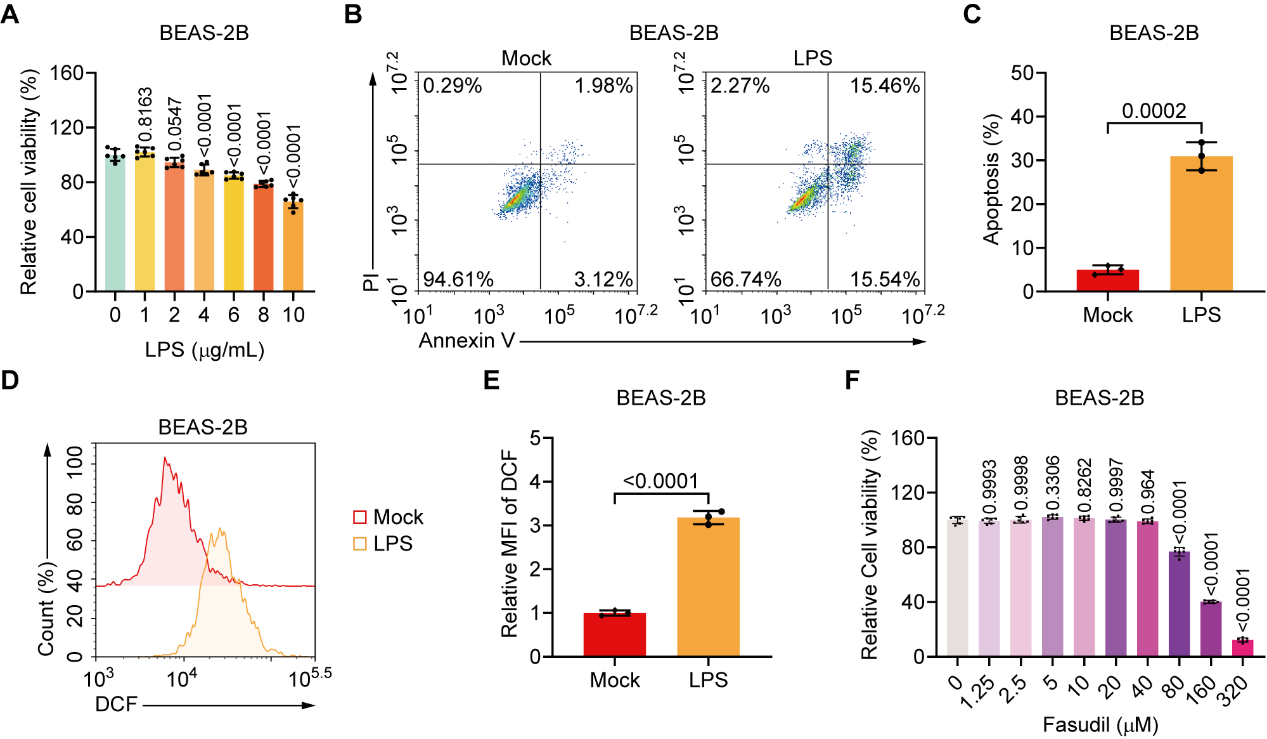
**

**Figure S1. Optimization of LPS and Fas concentrations for treating BEAS-2B cells.** (A) CCK-8 data indicating cell viability of cells treated with LPS. (B, C) Annexin V/PI staining showing apoptosis levels in cells treated with PBS (mock) or 10 μg/mL LPS. (D, E) DCF-DA staining revealing ROS levels. (F) CCK-8 results showing the viability of cells treated with various concentrations of Fas.


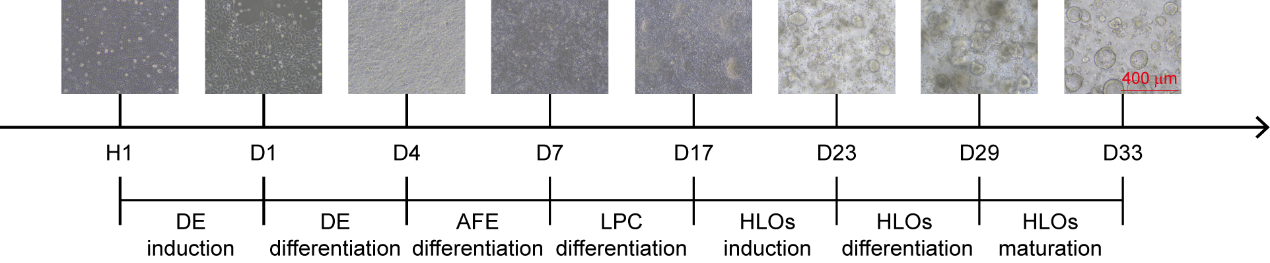


**Figure S2. Timeline of the differentiation process of HLOs from hESCs.**

**
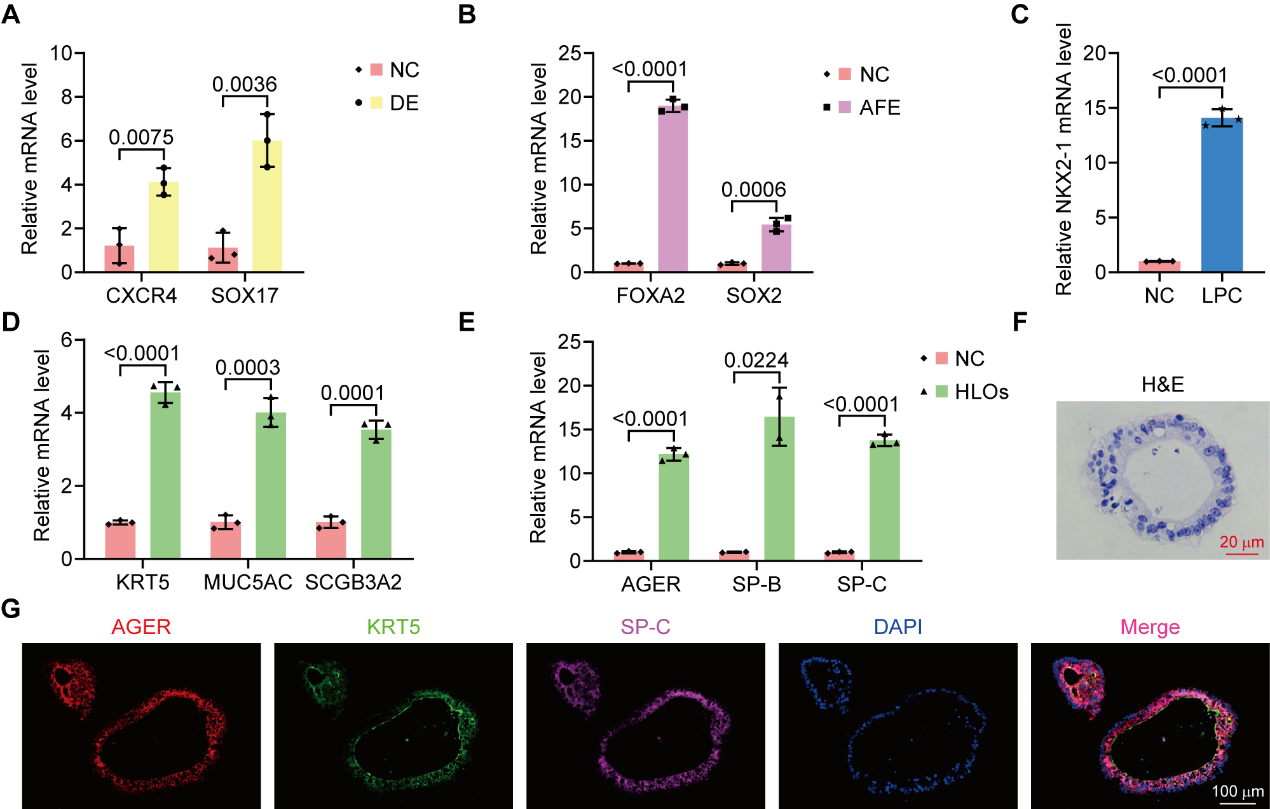
**

**Figure S3. Characterization of HLOs.** (A) qPCR data showing upregulated expression of DE markers CXCR4 and SOX17 in differentiating hESCs compared to untreated hESCs. (B) qPCR data showing increased expression of AFE markers FOXA2 and SOX2 during differentiation. (C) qPCR results showing higher expression of LPC marker NKX2-1 in differentiating hESCs compared to undifferentiated hESCs. (D, E) qPCR results showing increased expression of HLO progenitor cell markers KRT5 and SCGB3A2, and differentiated lung epithelial markers MUC5AC, AGER, SP-B, and SP-C. (F) H&E staining showing the morphology of HLOs. (G) IF staining showing expression of AGER, KRT5, and SP-C in HLOs. DAPI stains the nuclei.
